# Supplementary material for: Methylation-associated silencing of miR-193a-3p promotes ovarian cancer aggressiveness by targeting GRB7 and MAPK/ERK pathways
Source: PubMed Central journal article supplement — Theranostics. 2018 Jan 1;8(2):423–36. doi: 10.7150/thno.22377 (PMC5743558; doi:10.7150/thno.22377), 2018-01-01

**Supplementary Table S1:** The list of 78 targets of miR-193a-3p commonly found by three algorithms; miRDB, miRnada and TargetScan.

| <b>Gene Symbol</b> | <b>miRanda-mirSVR score</b> | <b>TargetScan context score</b> | <b>miRDB target score</b> |
|--------------------|-----------------------------|---------------------------------|---------------------------|
| SLC10A6            | -0.5816                     | -1.3                            | 95                        |
| FLI1               | -0.4927/-0.5492             | -0.92                           | 97                        |
| SLC39A5            | -0.8454                     | -0.76                           | 89                        |
| DCAF7              | -0.4517                     | -0.72                           | 99                        |
| AP2M1              | -1.1939                     | -0.7                            | 92                        |
| FAM84A             | -0.2693                     | -0.7                            | 53                        |
| FHDC1              | -0.8628/-0.4939             | -0.67                           | 100                       |
| CBX7               | -0.2752                     | -0.63                           | 86                        |
| SLC16A6            | -0.9332                     | -0.61                           | 95                        |
| ERBB4              | -0.0253                     | -0.63                           | 90                        |
| ST6GALNAC5         | -1.2195                     | -0.6                            | 76                        |
| HOXD13             | -1.213                      | -0.63                           | 91                        |
| ZNF385B            | -0.4065                     | -0.58                           | 79                        |
| KRAS               | -0.1648                     | -0.77                           | 53                        |
| ZBTB5              | -0.1481                     | -0.62                           | 88                        |
| MMP19              | -0.732                      | -0.59                           | 72                        |
| E2F6               | -0.5703                     | -0.56                           | 91                        |
| CCND1              | -1.1568                     | -0.57                           | 51                        |
| CTDSPL2            | -1.1401                     | -0.58                           | 81                        |
| SON                | -0.7935                     | -0.52                           | 62                        |
| STMN1              | -0.9663                     | -0.52                           | 74                        |
| EN2                | -0.493                      | -0.57                           | 70                        |
| MYCN               | -0.6757                     | -0.51                           | 80                        |
| WDR82              | -0.4731                     | -0.52                           | 79                        |
| NOVA1              | -0.9344                     | -0.5                            | 93                        |
| CNOT6              | -0.5372                     | -0.49                           | 83                        |
| TCF4               | -0.4005                     | -0.49                           | 56                        |
| UBP1               | -0.3915                     | -0.53                           | 54                        |
| SOS2               | -1.2414                     | -0.48                           | 96                        |
| MCL1               | -0.2322                     | -0.5                            | 70                        |
| NSF                | -0.6182                     | -0.54                           | 54                        |
| GNAO1              | -0.73                       | -0.47                           | 71                        |
| PLAU               | -1.1626                     | -0.44                           | 87                        |

|          |         |       |    |
|----------|---------|-------|----|
| STX16    | -0.7442 | -0.71 | 92 |
| ARHGEF12 | -0.7813 | -0.45 | 88 |
| GRB7     | -0.8188 | -0.42 | 85 |
| ING1     | -1.0744 | -0.87 | 51 |
| CNBP     | -0.6264 | -0.41 | 75 |
| RUNX1T1  | -0.7889 | -0.4  | 85 |
| SIAH1    | -1.2014 | -0.4  | 94 |
| ETV1     | -0.2897 | -0.45 | 81 |
| LAMC1    | -1.0379 | -0.5  | 52 |
| LAMC2    | -0.5883 | -0.39 | 94 |
| ZNF248   | -0.9027 | -0.62 | 69 |
| LAMP2    | -0.6894 | -0.39 | 86 |
| YWHAZ    | -0.4055 | -0.37 | 77 |
| CALB1    | -0.8804 | -0.37 | 84 |
| KIT      | -0.2177 | -0.36 | 79 |
| ERBB2IP  | -1.0406 | -0.36 | 80 |
| TMEM30A  | -0.4191 | -0.35 | 89 |
| SEPN1    | -0.1612 | -0.36 | 80 |
| ADAMTSL3 | -0.7972 | -0.34 | 87 |
| TGFBR3   | -0.4183 | -0.33 | 87 |
| FAT4     | -1.0034 | -0.33 | 91 |
| ARMC1    | -0.2726 | -0.32 | 88 |
| GDF11    | -0.3873 | -0.72 | 60 |
| NAV3     | -0.3963 | -0.31 | 50 |
| ZC3H11A  | -1.0175 | -0.31 | 51 |
| TBL1XR1  | -0.2676 | -0.3  | 95 |
| TNFRSF21 | -0.4415 | -0.3  | 54 |
| NT5E     | -1.181  | -0.67 | 90 |
| CAPRIN1  | -0.5452 | -0.67 | 87 |
| SCYL3    | -0.3719 | -0.28 | 76 |
| NRIP1    | -0.3921 | -0.26 | 86 |
| ABI2     | -0.4639 | -1.31 | 90 |
| LRP4     | -0.4991 | -0.24 | 93 |
| RSF1     | -0.6646 | -0.24 | 86 |
| TGFB2    | -0.3377 | -0.24 | 84 |
| DNAJC13  | -0.4939 | -0.23 | 72 |
| DAAM2    | -0.1716 | -0.21 | 63 |

|          |         |       |    |
|----------|---------|-------|----|
| RNF222   | -0.1655 | -0.2  | 55 |
| DUSP7    | -0.5282 | -0.31 | 70 |
| BRPF1    | -0.1217 | -0.16 | 56 |
| TP53INP1 | -0.1335 | -0.35 | 63 |
| FLRT3    | -0.865  | -0.35 | 89 |
| DYRK2    | -0.6342 | -0.35 | 60 |
| ETV6     | -0.1558 | -0.31 | 54 |
| CADM1    | -0.8638 | -0.34 | 83 |

# Supplementary Figure S1

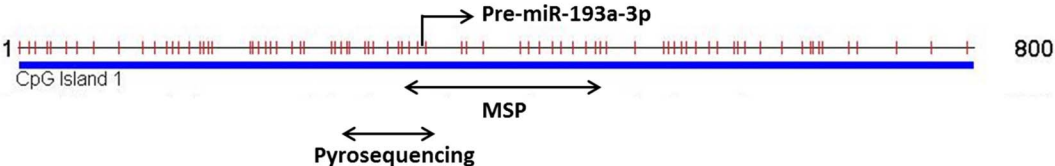

**Supplementary Figure S2**

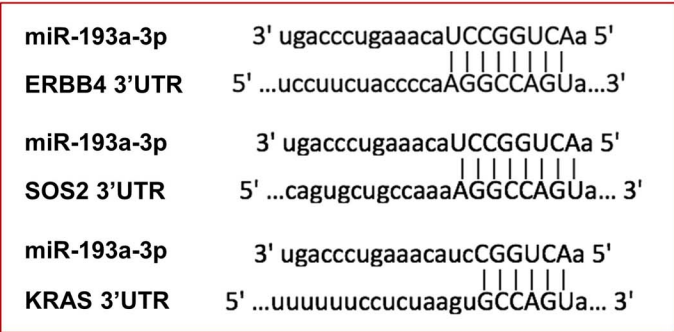

Supplementary Figure S3

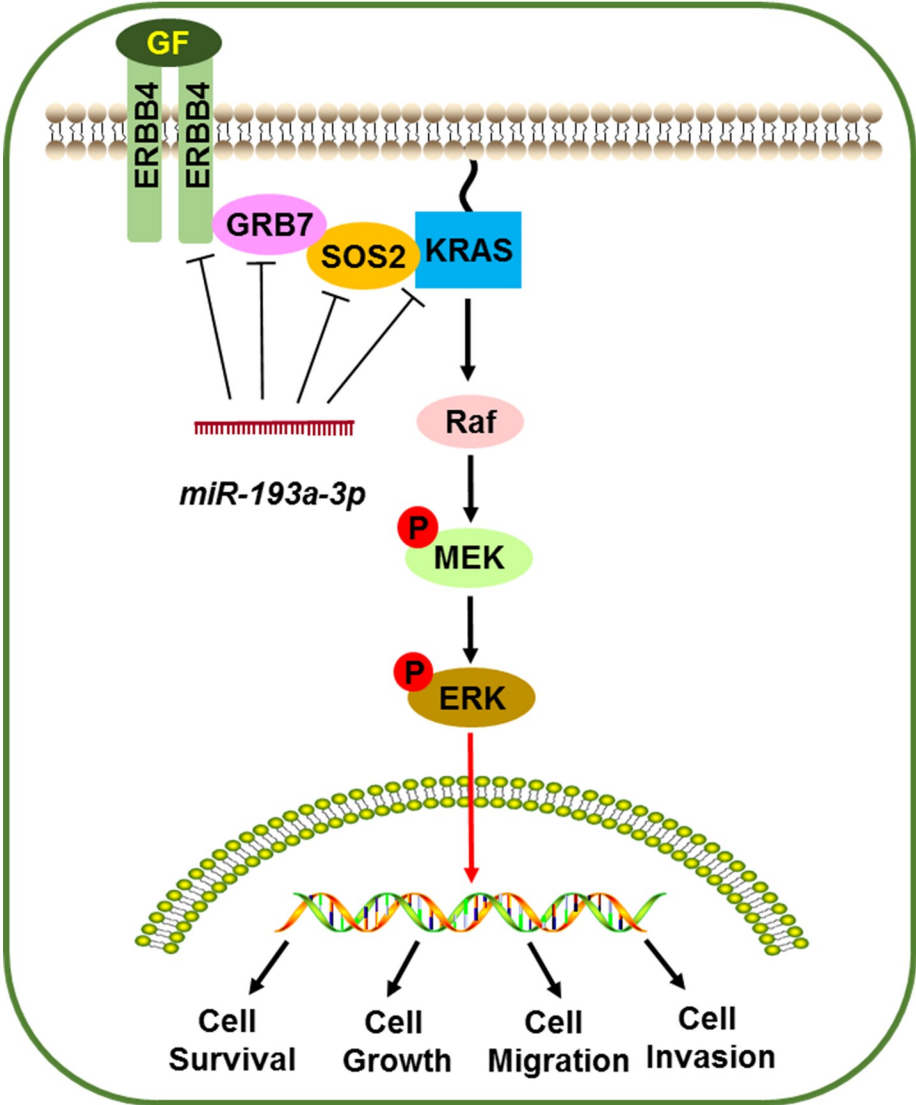

Supplement: thnov08p0423s1.pdf [file thnov08p0423s1.pdf]
